# Supplementary material for: IQM-PC332, a Novel DREAM Ligand with Antinociceptive Effect on Peripheral Nerve Injury-Induced Pain
Source: MDPI journal article supplement (doi:10.3390/ijms23042142), 2022-02-15
Supplement: s1 [file s1]

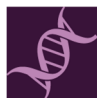

Article

# IQM-PC332, a Novel DREAM Ligand with Antinociceptive Effect on Peripheral Nerve Injury-Induced Pain

Paula G. Socuéllamos <sup>1,2,†</sup>, Luis A. Olivos-Oré <sup>1,3,†</sup>, María Victoria Barahona <sup>1,3,†</sup>, Pilar Cercós <sup>4</sup>, Marta Pérez Pascual <sup>1</sup>, Marina Arribas-Blázquez <sup>1,3</sup>, José Ramón Naranjo <sup>5,6</sup>, Carmen Valenzuela <sup>2,7</sup>, Marta Gutiérrez-Rodríguez <sup>4,\*</sup> and Antonio R. Artalejo <sup>1,3,\*</sup>

<sup>1</sup> Department of Pharmacology and Toxicology, Veterinary Faculty, and Instituto Universitario de Investigación en Neuroquímica (IUN), Universidad Complutense de Madrid, 28040 Madrid, Spain; olivos@ucm.es (L.A.O.-O.); vbg@ucm.es (M.V.B.); martpe13@ucm.es (M.P.P.); marina.arribas@vet.ucm.es (M.A.-B.); artalejo@ucm.es (A.R.A.)

<sup>2</sup> Instituto de Investigaciones Biomédicas Alberto Sols (IIBM), CSIC-UAM, 28029 Madrid, Spain; paulagar-  
cia@iib.uam.es (P.G.S.); cvalenzuela@iib.uam.es (C.V.)

<sup>3</sup> Instituto de Investigación Sanitaria San Carlos, 28040 Madrid, Spain

<sup>4</sup> Instituto de Química Médica (IQM-CSIC), 28006 Madrid, Spain; pcercos@nebrija.es

<sup>5</sup> Centro Nacional de Biotecnología–Consejo Superior de Investigaciones Científicas (CSIC),  
28049 Madrid, Spain; naranjo@cnb.csic.es

<sup>6</sup> Centro de Investigación Biomédica en Red Enfermedades Neurodegenerativas (CIBERNED),  
28031 Madrid, Spain

<sup>7</sup> Centro de Investigación Biomédica en Red Enfermedades Cardiovasculares (CIBERCV),  
28029 Madrid, Spain

\* Correspondence: artalejo@ucm.es (A.R.A.); mgutierrez@iqm.csic.es (M.G.-R.)  
Tel.: +34-91-258-7493 (M.G.-R.); +34-913-943-851 (A.R.A.)

† These authors contributed equally to this work.

**Citation:** Socuéllamos, P.G.;

Olivos-Oré, L.A.; Barahona, M.V.;

Cercós, P.; Pascual, M.P.;

Arribas-Blázquez, M.; Naranjo, J.R.;

Valenzuela, C.; Gutiérrez-Rodríguez,

M.; Artalejo, A.R. IQM-PC332, a

Novel DREAM Ligand with Antino-  
ciceptive Effect on Peripheral Nerve  
Injury-Induced Pain. *Int. J. Mol. Sci.*

**2022**, *23*, 2142. [https://doi.org/](https://doi.org/10.3390/ijms23042142)

[10.3390/ijms23042142](https://doi.org/10.3390/ijms23042142)

Academic Editor: Irmgard Tegeder

Received: 22 December 2021

Accepted: 12 February 2022

Published: 15 February 2022

**Publisher's Note:** MDPI stays neu-  
tral with regard to jurisdictional  
claims in published maps and institu-  
tional affiliations.

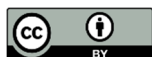

**Copyright:** © 2022 by the authors. Li-  
censee MDPI, Basel, Switzerland.  
This article is an open access article  
distributed under the terms and con-  
ditions of the Creative Commons At-  
tribution (CC BY) license ([https://cre-  
ativecommons.org/licenses/by/4.0/](https://creativecommons.org/licenses/by/4.0/)).

## Supplementary Materials:

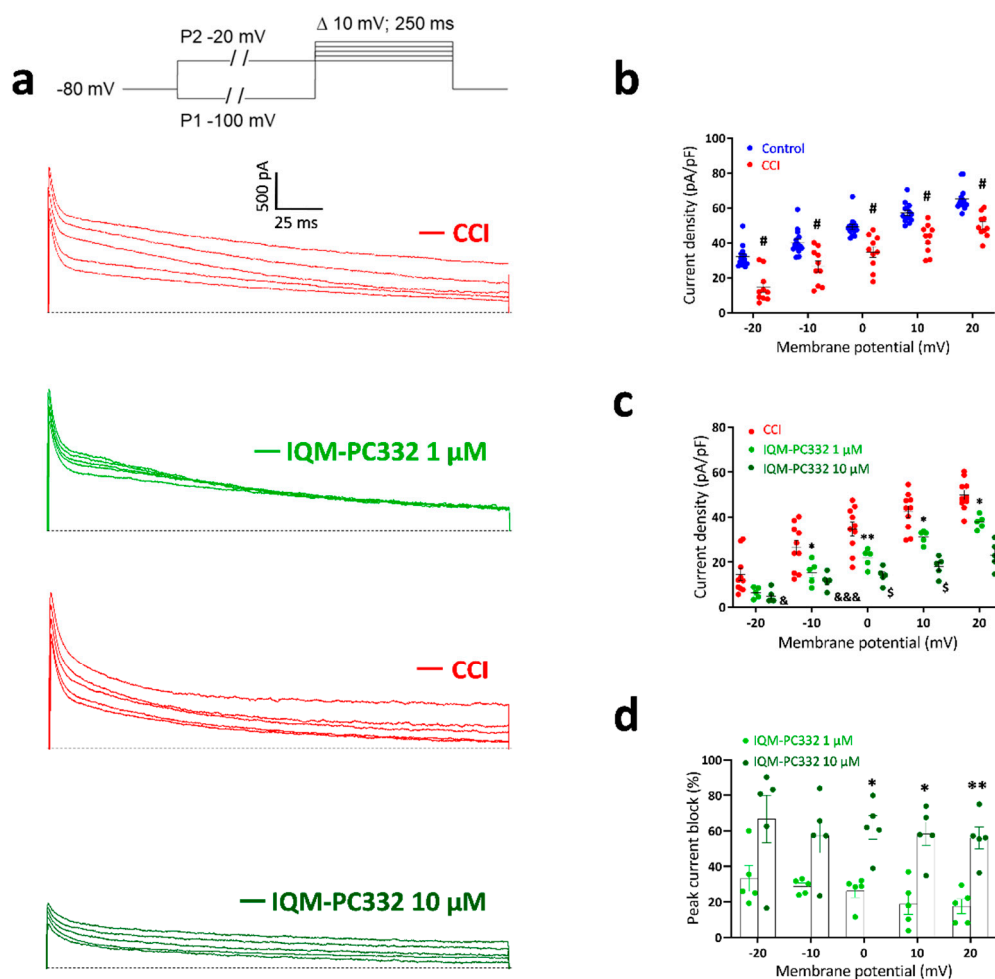

**Figure S1.** Effect of IQM-PC332 on  $I_A$  currents of DRG neurons from CCI animals. **a**) Representative recordings of  $I_A$  isolated by using the voltage protocol depicted on top of the panels. The effect of IQM-PC332 1 μM (*upper panel*) or 10 μM (*lower panel*) is shown. **b**) Peak current density to voltage (I-V) relation in Control (membrane capacitance of  $32.23 \pm 0.94$  pF;  $n = 14$  cells) and CCI (membrane capacitance of  $31.40 \pm 0.93$  pF;  $n = 10$  cells) DRG neurons. **c**) I-V relation in the absence (CCI) and presence of IQM-PC332 1 μM (membrane capacitance of  $32.62 \pm 1.23$  pF;  $n = 5$  cells) and 10 μM (membrane capacitance of  $30.19 \pm 1.30$  pF;  $n = 5$  cells). **d**) Percent block of peak  $I_A$  by IQM-PC332 (1 μM and 10 μM) at different potentials. Data are expressed as mean  $\pm$  SEM. Statistical significance was assessed by two-way ANOVA, followed by a Bonferroni's test for multiple comparisons with respect to Control (**b**), CCI (**c**) and IQM-PC332 1 μM (**d**). \* and &:  $p < 0.05$ ; \*\*:  $p < 0.01$ ; &&&:  $p < 0.001$ ; # and \$:  $p < 0.0001$ .

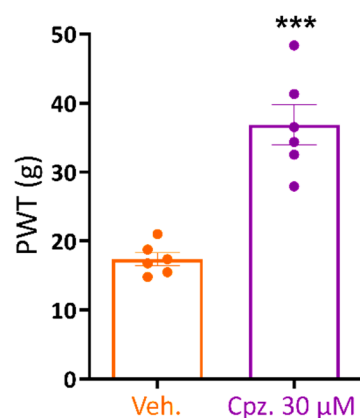

**Figure S2.** Effect of capsazepine on mechanical sensitivity in CCI animals. Paw withdrawal threshold (PWT) as an indicator of mechanical sensitivity was determined after i.pl. administration of 30  $\mu$ g capsazepine (Cpz.), a TRPV1 channel blocker, or vehicle (Veh.; Tween 80/ethanol/saline; 10/10/80). Data are expressed as the mean  $\pm$  SEM of 6 measurements ( $n = 6$  animals). Statistical significance was assessed by using Student's *t*-test for paired comparisons. \*\*\*,  $P < 0.001$  with respect to Veh.
